# Supplementary material for: Practical aspects of electrophoretic deposition to produce commercially viable supercapacitor energy storage electrodes
Source: Royal Society of Chemistry journal article supplement (doi:10.1039/d0ra09197a), 2021-01-01
Supplement: d0ra09197a1.pdf [file d0ra09197a1.pdf]

## Supporting Information

### Practical Aspects of Electrophoretic Deposition to Produce Commercially Viable Supercapacitor Energy Storage Electrodes

Barun Kumar Chakrabarti, Chee Tong John Low

WMG, Warwick Electrochemical Engineering Group, Energy Innovation Centre, University of Warwick, Coventry, CV4 7AL, United Kingdom.

[Barun.Chakrabarti@warwick.ac.uk](mailto:Barun.Chakrabarti@warwick.ac.uk) (Dr. Barun Kumar Chakrabarti)

[C.T.J.Low@warwick.ac.uk](mailto:C.T.J.Low@warwick.ac.uk) (Dr. Chee Tong John Low)

#### 1. Activated carbon material properties

| Material properties                         | Values                       |
|---------------------------------------------|------------------------------|
| Activated carbon brand name                 | YEC-8B                       |
| Manufacturer                                | Fuzhou Yihuan Carbon (China) |
| Surface Area ( $\text{m}^2 \text{g}^{-1}$ ) | 2000 to 2500                 |
| Ash (%)                                     | < 0.5                        |
| Moisture (%)                                | <5                           |
| Bulk Density ( $\text{g mL}^{-1}$ )         | 0.4                          |
| Capacitance with PC ( $\text{F g}^{-1}$ )   | 140                          |
| Capacitance with KOH ( $\text{F g}^{-1}$ )  | 260                          |

**Table S1.** Specification of activated carbon used in this research study.

#### 2. EPD operation and setup

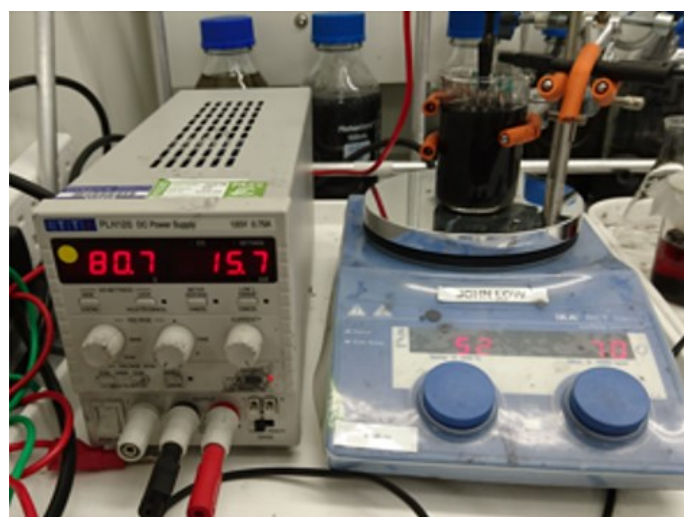

**Figure S1.** A simple beaker version of electrochemical cell setup. Power supply rating (max 250 V, 750 mA) and beaker volume (max 100 mL). Colloidal electrolyte was kept under 300 rpm and 40 °C.

### 3. EPD electrodes in coin cell

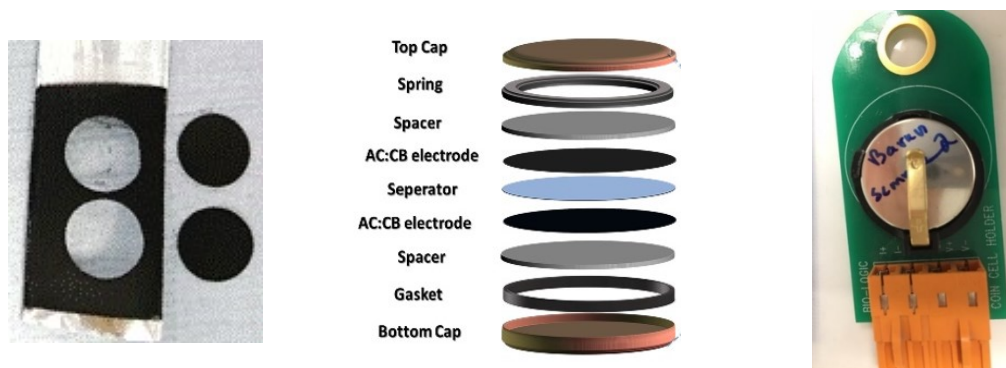

**Figure S2.** EPD electrodes in coin cell (CR2032 format). Symmetric coin cell setup was assembled.

### 4. BET and pore size of activated carbon particles

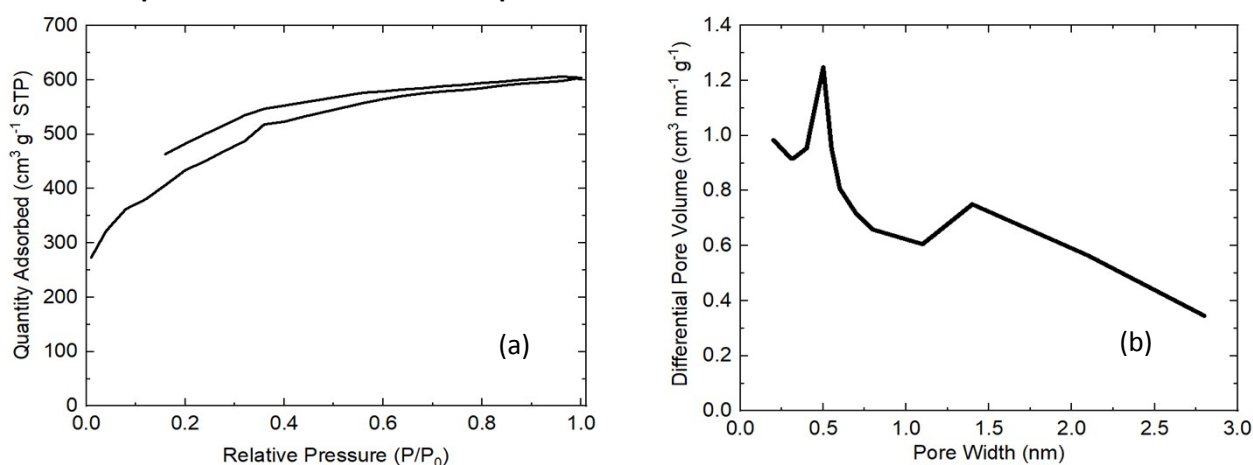

**Figure S3.** Material properties of activated carbon particles. (a) BET adsorption/desorption isotherms. (b) Pore size distributions (NLDFT). Specific surface area of activated carbon was determined to be  $2000 \text{ m}^2 \text{ g}^{-1}$  along with  $0.47 \text{ cm}^3 \text{ g}^{-1}$  pore volume and  $1.1 \text{ nm}$  pore diameter.

### 5. X-ray photoelectron spectroscopy analysis of EPD electrode

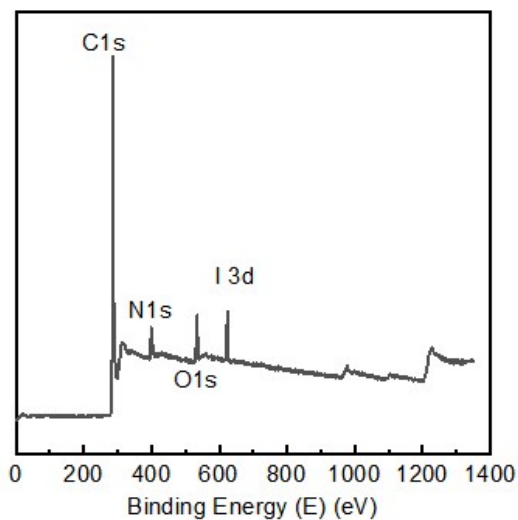

**Figure S4.** XPS analysis of EPD electrode; detection in the top 3 to 30 atomic layers ( $10$  to  $100 \text{ \AA}$ ). The majority 90% is carbon element; no fluorine detected and minor presence of iodine.

## 6. Elemental composition mapping analysis of EPD electrode

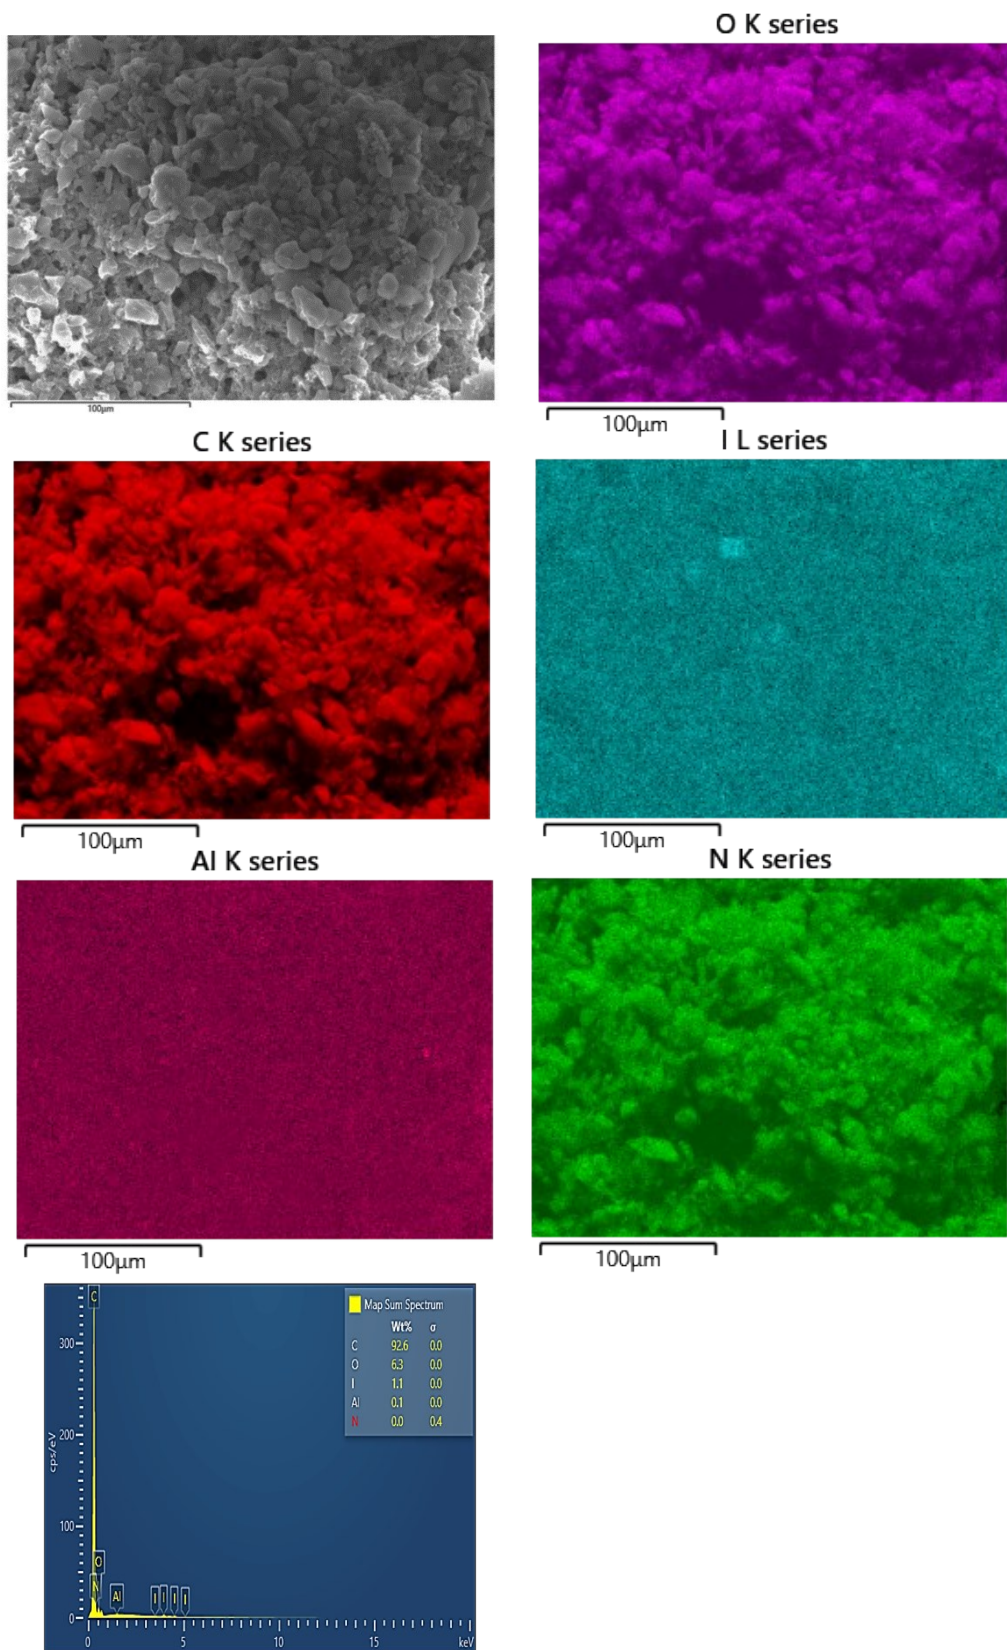

**Figure S5.** EDX mapping of EPD electrodes showing fluorine is undetectable (PVDF indication) and minor presence of iodine resulted from electrophoretic deposition. The EPD electrode was used as it is, i.e. no washing off with any liquid prior assembly into coin cell. The presence of iodine could be resulted from the charging agent inclusion during deposition, as well as left-over solution from non-washed electrode.

## 7. Cyclic voltammetry response of electrodes (EPD vs slurry cast)

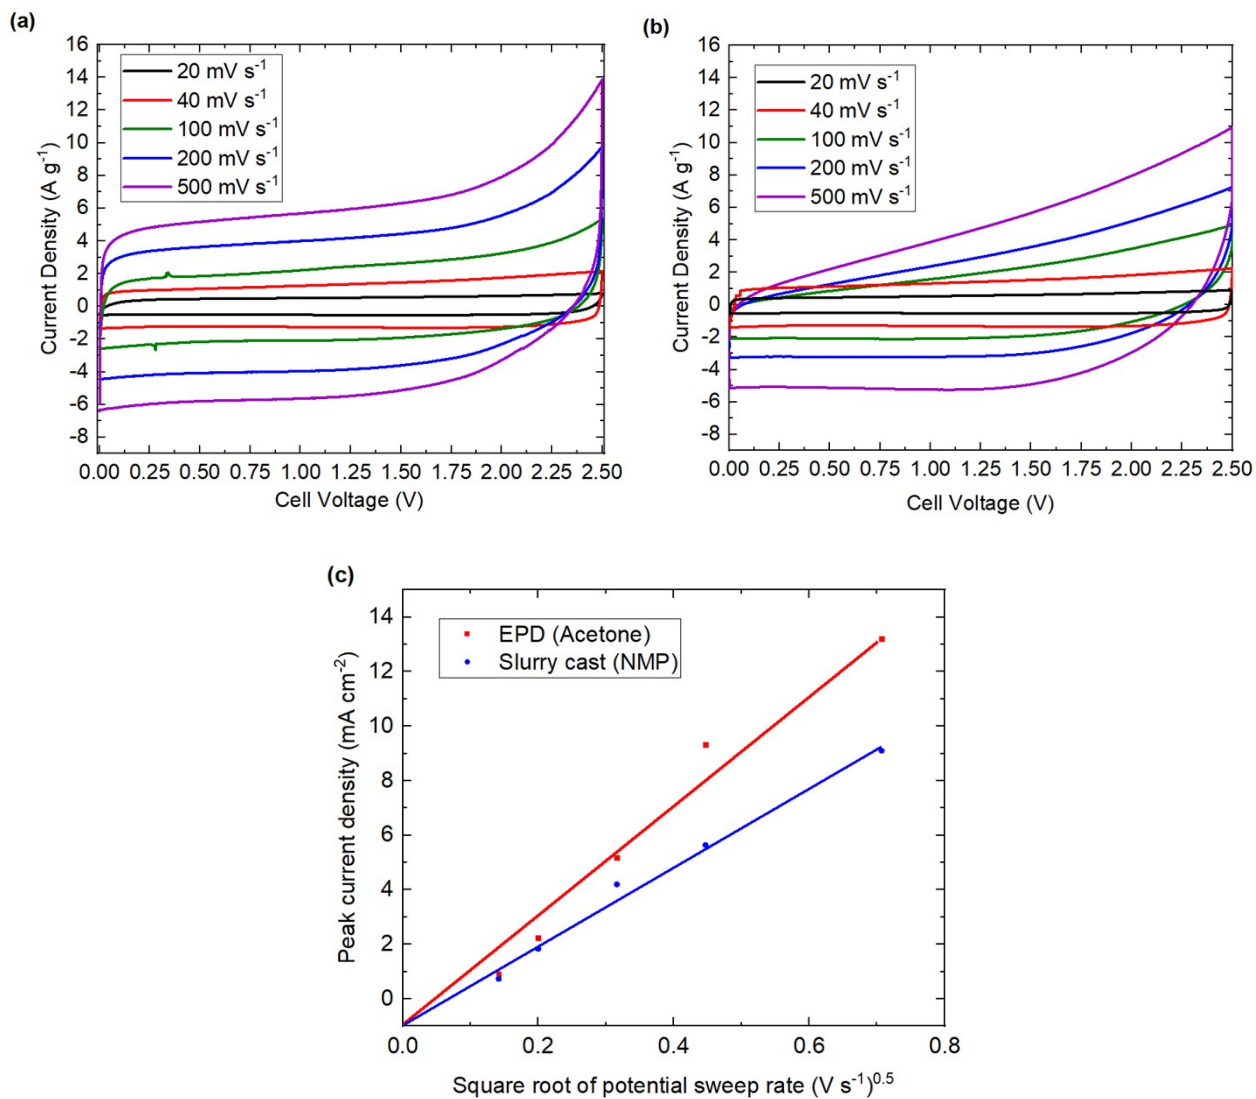

**Figure S6.** Applied voltage vs recorded current response of deposited electrodes. (a) EPD electrode using acetone recipe. (b) Slurry cast electrode using NMP recipe. (c) Randles-Sevcik plot at 1.5 V to determine diffusion coefficient of ionic species.

Diffusion coefficient for EPD (Acetone) from Figure S6(c) =  $9.4 \times 10^{-6} \text{ cm}^2 \text{ s}^{-1}$

Diffusion coefficient for slurry cast (NMP) from Figure S6(c) =  $2.3 \times 10^{-6} \text{ cm}^2 \text{ s}^{-1}$

Almost 5 times higher diffusion rate for EPD (Acetone) vs Slurry cast (NMP).

| Current density (A/g) | Specific capacitance (F g <sup>-1</sup> ) |                   | Performance advantage (%) |
|-----------------------|-------------------------------------------|-------------------|---------------------------|
|                       | EPD (Acetone)                             | Slurry cast (NMP) |                           |
| 0.1                   | 154.08                                    | 107.00            | 44                        |
| 0.2                   | 144.25                                    | 100.35            | 44                        |
| 0.5                   | 140.97                                    | 92.20             | 53                        |
| 1                     | 133.59                                    | 90.50             | 48                        |
| 2                     | 119.66                                    | 83.17             | 44                        |
| 5                     | 99.99                                     | 68.89             | 45                        |
| 10                    | 68.84                                     | 56.91             | 21                        |

**Table S2.** Recorded performance values for Figure 5.

### 8. Galvanostatic cycling and Ragone plot (EPD vs slurry cast)

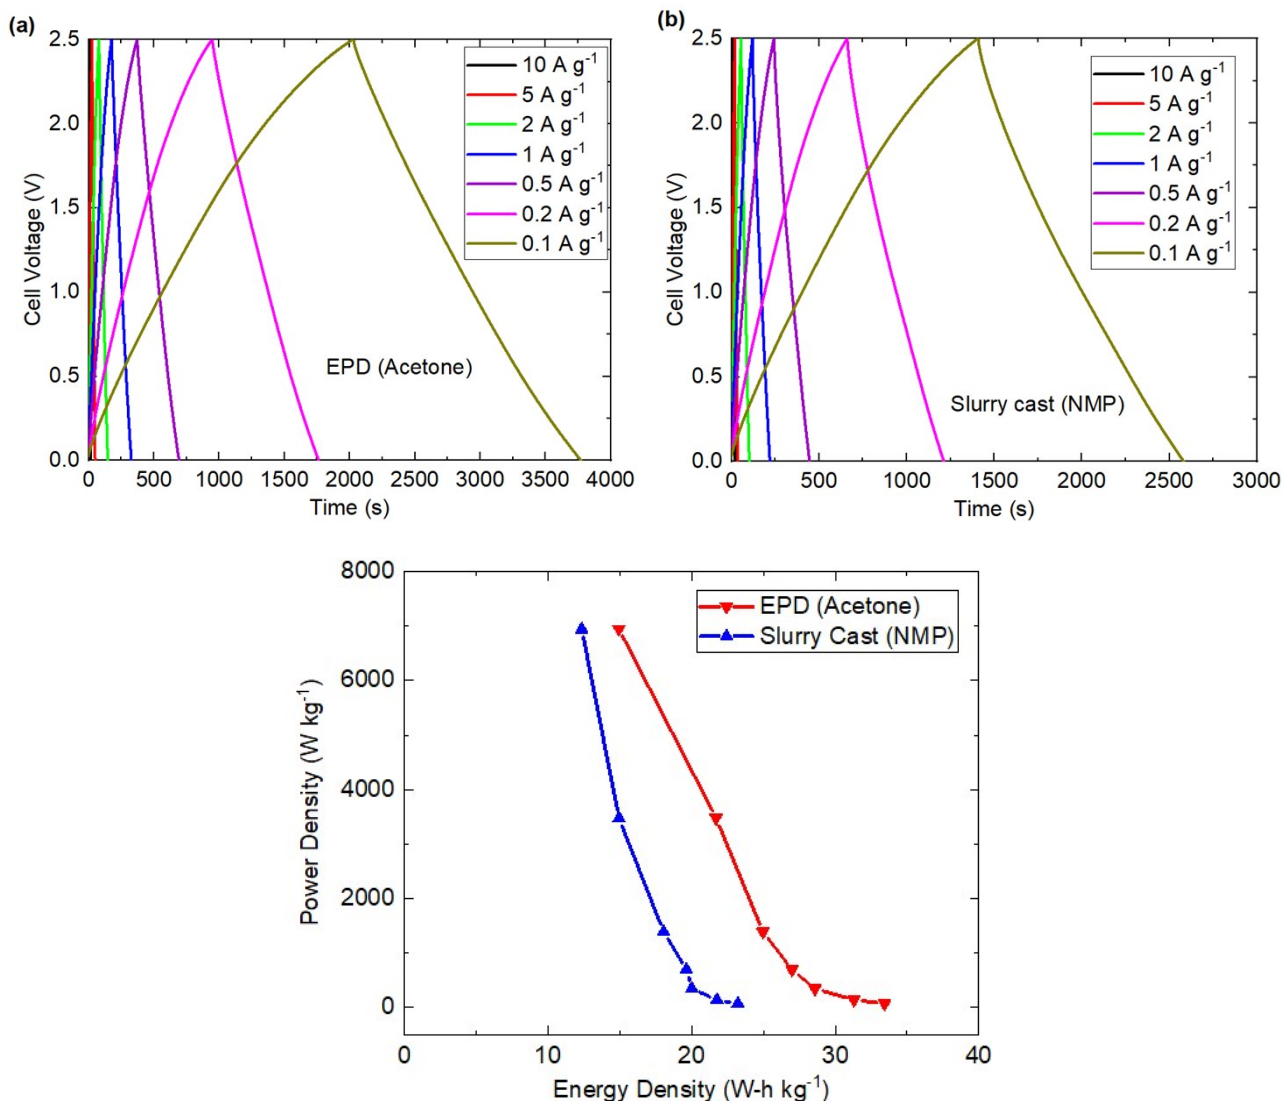

**Figure S7.** Constant current cycling and comparing data. (a) EPD electrode using acetone recipe. (b) Slurry cast electrode using NMP recipe. (c) Ragone plot showing data from both electrodes.

| EPD (Acetone)                        |                                      | Slurry cast (NMP)                    |                                      | Performance advantage based on energy density gained in EPD vs slurry cast electrode (%) |
|--------------------------------------|--------------------------------------|--------------------------------------|--------------------------------------|------------------------------------------------------------------------------------------|
| Energy density (W kg <sup>-1</sup> ) | Power density (Wh kg <sup>-1</sup> ) | Energy density (W kg <sup>-1</sup> ) | Power density (Wh kg <sup>-1</sup> ) |                                                                                          |
| 33.44                                | 69.99                                | 23.22                                | 69.44                                | 44                                                                                       |
| 31.30                                | 138.89                               | 21.78                                | 138.89                               | 44                                                                                       |
| 30.59                                | 347.22                               | 20.01                                | 347.22                               | 53                                                                                       |
| 28.99                                | 694.44                               | 19.64                                | 694.46                               | 48                                                                                       |
| 25.97                                | 1388.84                              | 18.049                               | 1388.89                              | 44                                                                                       |
| 21.70                                | 3479.54                              | 14.95                                | 3472.11                              | 45                                                                                       |
| 14.94                                | 6948.91                              | 12.35                                | 6944.72                              | 21                                                                                       |

**Table S3.** Recorded performance values for Figure S7.
